# Supplementary material for: Impact of liver volume on polycystic liver disease-related symptoms and quality of life
Source: PubMed Central journal article supplement — United European Gastroenterol J. 2017 Apr 13;6(1):81–8. doi: 10.1177/2050640617705577 (PMC5802666; doi:10.1177/2050640617705577), 2017-04-13
Supplement: Supplemental_Figure1.pdf [file Supplemental_Figure1.pdf]

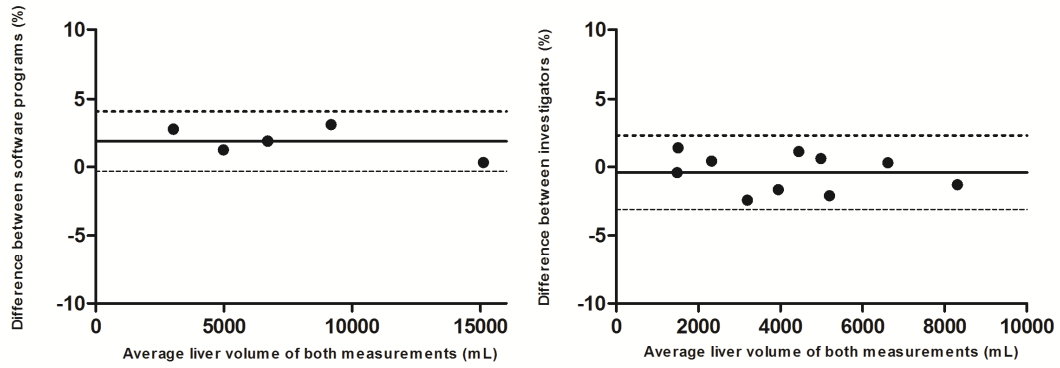

**Supplemental Figure 1.** Left panel: Bland-Altman plot shows a  $1.8\% \pm 1.1$  difference between liver volumes of five scans measured with ITK-SNAP compared to Pinnacle<sup>3</sup> software. Right panel: Bland-Altman plot shows a .4% difference between ten MRI liver volume measurements of two investigators (MN and SV) using ITK-SNAP software. The dotted lines reflect the 95% limits of agreement.
